# Supplementary material for: Effects of Omega-3-Rich Pork Lard on Serum Lipid Profile and Gut Microbiome in C57BL/6NJ Mice
Source: Hindawi journal article supplement (doi:10.1155/2022/9269968), 2022-11-22
Supplement: f1 [file 9269968.f1.zip]

Supplementary table S10: Comparison between raw material analyzed data and USDA data

| Components (100g)                                              | Energy<br>(kcal/100g) | Protein<br>content<br>(g) | Carbohy<br>drate<br>content<br>(g) | Fat<br>content<br>(g) |
|----------------------------------------------------------------|-----------------------|---------------------------|------------------------------------|-----------------------|
| Rice, steamed                                                  | 138.41                | 2.24                      | 31.75                              | 0.27                  |
| USDA: Rice, white, cooked NDB#20445                            | 130.00                | 2.69                      | 28.20                              | 0.28                  |
| Red bean, steamed                                              | 145.65                | 8.55                      | 26.09                              | 0.79                  |
| USDA: Beans, kidney, California red NDB#16033                  | 127.00                | 8.67                      | 22.80                              | 0.50                  |
| Carrot, steamed                                                | 37.98                 | 1.64                      | 7.34                               | 0.23                  |
| USDA: Carrots, cooked, boiled NDB#11125                        | 35.00                 | 0.76                      | 8.22                               | 0.18                  |
| Grain, boiled                                                  | 148.99                | 4.59                      | 27.30                              | 2.39                  |
| USDA: Millet, cooked NDB#20032                                 | 119.00                | 3.51                      | 23.70                              | 1.00                  |
| Pea, boiled                                                    | 78.96                 | 5.22                      | 13.62                              | 0.40                  |
| USDA: Peas, green, cooked, boiled NDB#11811                    | 84.00                 | 5.36                      | 15.60                              | 0.22                  |
| Corn, boiled                                                   | 166.80                | 3.30                      | 35.70                              | 1.20                  |
| USDA: Corn, sweet, white, cooked, boiled<br>NDB#11902          | 97.00                 | 3.34                      | 21.70                              | 1.41                  |
| Chicken breast, without skin, boiled                           | 112.20                | 24.90                     | 0.00                               | 1.40                  |
| USDA: Chicken, breast, skinless, meat only,<br>cooked NDB#5749 | 148.00                | 29.5                      | 0.00                               | 3.39                  |
| Coconut oil                                                    | 900.00                | 0.00                      | 0.00                               | 100.00                |
| USDA: Oil, coconut NDB#4047                                    | 892.00                | 0.00                      | 0.00                               | 99.10                 |
| Omega lard                                                     | 900.00                | 0.00                      | 0.00                               | 100.00                |
| USDA: Lard NDB#4002                                            | 902.00                | 0.00                      | 0.00                               | 100.00                |
