# Supplementary material for: Effects of Omega-3-Rich Pork Lard on Serum Lipid Profile and Gut Microbiome in C57BL/6NJ Mice
Source: Hindawi journal article supplement (doi:10.1155/2022/9269968), 2022-11-22
Supplement: f1 [file 9269968.f1.zip]

Supplementary table S8: Microbiome abundance

| Mouse # | Muribaculacea | Lachnospiracea | Ruminococcac | Prevotellaceae | Akkermansiaceae |
|---------|---------------|----------------|--------------|----------------|-----------------|
| 1.00    | 40.10         | 30.66          | 18.22        | 3.91           | 1.32            |
| 1.00    | 35.11         | 12.79          | 24.91        | 7.49           | 2.97            |
| 1.00    | 34.84         | 32.28          | 17.54        | 4.67           | 1.38            |
| 1.00    | 23.40         | 28.90          | 25.35        | 8.13           | 2.58            |
| 1.00    | 51.60         | 18.27          | 11.81        | 12.41          | 1.49            |
| 1.00    | 26.35         | 34.69          | 25.92        | 2.77           | 3.61            |
| 1.00    | 30.39         | 19.72          | 26.31        | 7.96           | 3.62            |
| 1.00    | 29.26         | 31.13          | 25.95        | 4.63           | 4.04            |
| 2.00    | 25.30         | 13.88          | 25.35        | 8.09           | 2.99            |
| 2.00    | 32.90         | 11.14          | 12.81        | 8.75           | 5.43            |
| 2.00    | 39.63         | 30.45          | 15.90        | 1.23           | 2.86            |
| 2.00    | 33.67         | 5.23           | 16.82        | 7.66           | 2.03            |
| 2.00    | 44.66         | 17.56          | 10.31        | 2.48           | 7.02            |
| 2.00    | 41.85         | 11.77          | 14.68        | 13.21          | 5.04            |
| 2.00    | 47.60         | 5.73           | 25.41        | 9.31           | 2.65            |
| 3.00    | 32.34         | 15.79          | 19.94        | 5.98           | 3.14            |
| 3.00    | 36.79         | 22.78          | 20.22        | 6.34           | 4.31            |
| 3.00    | 37.93         | 18.16          | 15.98        | 8.21           | 6.96            |
| 3.00    | 41.16         | 20.70          | 16.45        | 9.91           | 3.17            |
| 3.00    | 48.99         | 18.36          | 15.58        | 3.50           | 3.28            |
| 3.00    | 40.08         | 20.47          | 13.74        | 12.44          | 3.71            |
| 3.00    | 41.11         | 29.52          | 15.76        | 1.99           | 1.57            |
| 3.00    | 50.37         | 23.56          | 13.81        | 3.48           | 1.14            |

| Rikenellaceae | Bacteroidaceae | diales | vadinBB6C | charimonadace | Peptococcaceae | Uncultured |
|---------------|----------------|--------|-----------|---------------|----------------|------------|
| 0.73          | 0.90           | 2.03   | 0.98      | 0.27          | 0.63           |            |
| 1.13          | 1.07           | 12.70  | 0.93      | 0.17          | 0.24           |            |
| 0.52          | 1.39           | 5.90   | 0.45      | 0.48          | 0.24           |            |
| 1.58          | 1.37           | 5.27   | 1.56      | 0.31          | 0.51           |            |
| 0.78          | 1.13           | 0.00   | 0.50      | 0.87          | 0.25           |            |
| 1.19          | 0.87           | 0.75   | 2.57      | 0.33          | 0.59           |            |
| 1.00          | 0.76           | 7.39   | 1.61      | 0.11          | 0.24           |            |
| 1.35          | 0.61           | 0.08   | 1.45      | 0.21          | 0.23           |            |
| 2.41          | 0.65           | 17.94  | 0.55      | 0.85          | 0.63           |            |
| 4.46          | 0.00           | 20.82  | 1.29      | 0.32          | 0.44           |            |
| 2.01          | 1.08           | 0.00   | 4.70      | 0.65          | 0.62           |            |
| 1.81          | 0.55           | 28.95  | 0.71      | 0.25          | 0.22           |            |
| 4.61          | 0.65           | 0.00   | 8.57      | 0.65          | 0.41           |            |
| 4.55          | 0.40           | 0.00   | 5.44      | 0.79          | 0.44           |            |
| 2.06          | 0.83           | 1.98   | 0.76      | 0.45          | 0.50           |            |
| 2.61          | 0.63           | 13.15  | 4.18      | 0.33          | 0.69           |            |
| 3.97          | 0.58           | 1.47   | 1.54      | 0.26          | 0.54           |            |
| 4.62          | 0.62           | 0.00   | 4.35      | 0.38          | 0.54           |            |
| 3.29          | 0.49           | 0.00   | 2.81      | 0.26          | 0.49           |            |
| 3.33          | 1.37           | 0.14   | 2.96      | 0.22          | 0.39           |            |
| 5.15          | 1.33           | 0.40   | 0.19      | 0.52          | 0.44           |            |
| 1.22          | 5.22           | 0.00   | 0.70      | 0.44          | 0.92           |            |
| 1.69          | 0.98           | 1.06   | 0.22      | 0.35          | 0.99           |            |

| Family XIII | Burkholderiaceae | Eggerthellaceae | Ysipelotrichaceae | Enterobacteriaceae | Lactobacillaceae |
|-------------|------------------|-----------------|-------------------|--------------------|------------------|
| 0.13        | 0.08             | 0.00            | 0.00              | 0.00               | 0.00             |
| 0.10        | 0.09             | 0.24            | 0.00              | 0.00               | 0.00             |
| 0.09        | 0.14             | 0.00            | 0.00              | 0.00               | 0.00             |
| 0.22        | 0.15             | 0.40            | 0.00              | 0.00               | 0.00             |
| 0.19        | 0.11             | 0.19            | 0.00              | 0.13               | 0.00             |
| 0.05        | 0.08             | 0.07            | 0.00              | 0.01               | 0.01             |
| 0.06        | 0.00             | 0.70            | 0.00              | 0.00               | 0.00             |
| 0.13        | 0.05             | 0.62            | 0.00              | 0.00               | 0.02             |
| 0.27        | 0.35             | 0.16            | 0.00              | 0.18               | 0.00             |
| 0.33        | 0.16             | 0.64            | 0.00              | 0.29               | 0.00             |
| 0.11        | 0.25             | 0.12            | 0.00              | 0.15               | 0.02             |
| 0.47        | 0.31             | 0.39            | 0.51              | 0.29               | 0.00             |
| 0.33        | 0.30             | 1.29            | 0.00              | 0.89               | 0.00             |
| 0.15        | 0.07             | 1.12            | 0.00              | 0.20               | 0.00             |
| 0.73        | 0.27             | 1.22            | 0.00              | 0.30               | 0.00             |
| 0.47        | 0.26             | 0.32            | 0.00              | 0.08               | 0.00             |
| 0.41        | 0.07             | 0.39            | 0.00              | 0.09               | 0.00             |
| 0.37        | 0.17             | 1.17            | 0.00              | 0.00               | 0.03             |
| 0.33        | 0.18             | 0.37            | 0.00              | 0.03               | 0.00             |
| 0.28        | 0.51             | 0.53            | 0.00              | 0.35               | 0.00             |
| 0.24        | 0.39             | 0.05            | 0.00              | 0.23               | 0.00             |
| 0.27        | 0.11             | 0.14            | 0.00              | 0.17               | 0.05             |
| 0.48        | 0.34             | 0.07            | 0.00              | 0.49               | 0.00             |
