# Supplementary material for: Effects of Omega-3-Rich Pork Lard on Serum Lipid Profile and Gut Microbiome in C57BL/6NJ Mice
Source: Hindawi journal article supplement (doi:10.1155/2022/9269968), 2022-11-22
Supplement: f1 [file 9269968.f1.zip]

Supplementary table S9: Microbiome and lipid profile correlation

|              | Lachnospiraceae |         | Bacteroidaceae |         | Peptoco     |
|--------------|-----------------|---------|----------------|---------|-------------|
|              | Coefficient     | P-value | Coefficient    | P-value | Coefficient |
| Cholesterol  | -.492*          | 0.017   | .628**         | 0.001   | 0.309       |
| Triglyceride | -.590**         | 0.003   | .683**         | 0.000   | 0.087       |
| LDL (mg/dL)  | -.462*          | 0.026   | .590**         | 0.003   | 0.343       |
| HDL (mg/dL)  | -.443*          | 0.034   | .670**         | 0.000   | 0.392       |

| ccaceae | Burkholderiaceae |         |
|---------|------------------|---------|
| P-value | Coefficient      | P-value |
| 0.151   | .561**           | 0.005   |
| 0.695   | .526**           | 0.010   |
| 0.109   | .540**           | 0.008   |
| 0.064   | .516*            | 0.012   |
