# Supplementary material for: Effects of Omega-3-Rich Pork Lard on Serum Lipid Profile and Gut Microbiome in C57BL/6NJ Mice
Source: Hindawi journal article supplement (doi:10.1155/2022/9269968), 2022-11-22
Supplement: f1 [file 9269968.f1.zip]

Supplementary table S5: Blood chemistry

| Treatment   | Mouse # | Glucose | Cholesterol | Triglyceride | LDL (mg/dL) |
|-------------|---------|---------|-------------|--------------|-------------|
| Control     | 1.00    | 133.85  | 128.00      | 92.40        | 11.60       |
|             | 2.00    | 170.20  | 140.90      | 106.30       | 19.20       |
|             | 3.00    | 205.55  | 118.20      | 104.10       | 11.00       |
|             | 4.00    | 172.30  | 136.20      | 107.50       | 21.00       |
|             | 5.00    | 176.15  | 127.30      | 107.60       | 12.10       |
|             | 6.00    | 149.90  | 135.60      | 104.1        | 15.70       |
|             | 7.00    | 161.85  | 124.80      | 88.70        | 10.90       |
|             | 8.00    | 177.45  | 114.30      | 105.20       | 10.50       |
| Coconut oil | 1.00    | 187.85  | 252.50      | 126.10       | 68.90       |
|             | 2.00    | 179.90  | 241.50      | 152.90       | 55.70       |
|             | 3.00    | 166.70  | 274.90      | 138.30       | 70.70       |
|             | 4.00    | 180.55  | 244.50      | 137.70       | 61.80       |
|             | 5.00    | 193.15  | 220.90      | 152.50       | 51.10       |
|             | 6.00    | 180.40  | 234.80      | 135.90       | 60.10       |
|             | 7.00    | 169.55  | 236.50      | 123.50       | 55.90       |
| Omega lard  | 1.00    | 172.50  | 206.10      | 126.80       | 40.10       |
|             | 2.00    | 172.75  | 233.90      | 122.60       | 56.80       |
|             | 3.00    | 166.15  | 214.50      | 131.20       | 41.80       |
|             | 4.00    | 173.20  | 209.50      | 114.80       | 38.90       |
|             | 5.00    | 154.20  | 221.90      | 97.80        | 47.50       |
|             | 6.00    | 168.10  | 237.50      | 122.60       | 51.90       |
|             | 7.00    | 171.30  | 192.70      | 103.70       | 49.00       |
|             | 8.00    | 166.40  | 243.10      | 115.10       | 59.90       |

| HDL (mg/dL) | BUN (mg/dL) | creatinine (mg/dl) | AST (U/L) | ALT (U/T) |
|-------------|-------------|--------------------|-----------|-----------|
| 109.00      | 22.60       | 0.08               | 73.50     | 17.50     |
| 116.80      | 23.40       | 0.18               | 133.70    | 54.20     |
| 99.10       | 19.30       | 0.10               | 83.10     | 20.00     |
| 107.40      | 22.60       | 0.12               | 95.20     | 21.70     |
| 105.40      | 21.90       | 0.08               | 53.60     | 15.60     |
| 111.70      | 23.10       | 0.08               | 59.40     | 20.10     |
| 106.50      | 22.80       | 0.09               | 81.90     | 20.80     |
| 95.50       | 23.80       | 0.14               | 58.80     | 18.90     |
| 209.90      | 24.30       | 0.09               | 91.20     | 40.40     |
| 198.80      | 29.50       | 0.11               | 135.00    | 33.30     |
| 209.10      | 21.20       | 0.09               | 77.40     | 34.70     |
| 179.90      | 25.00       | 0.12               | 113.80    | 34.70     |
| 167.80      | 23.60       | 0.12               | 72.40     | 24.60     |
| 184.50      | 22.90       | 0.09               | 84.80     | 29.70     |
| 188.10      | 26.30       | 0.12               | 68.10     | 22.00     |
| 170.90      | 26.40       | 0.15               | 113.70    | 23.40     |
| 184.30      | 21.40       | 0.12               | 72.40     | 36.10     |
| 173.90      | 20.10       | 0.13               | 105.90    | 35.70     |
| 174.40      | 21.20       | 0.08               | 103.00    | 32.60     |
| 180.40      | 23.60       | 0.10               | 76.80     | 28.60     |
| 194.00      | 21.30       | 0.12               | 96.40     | 45.30     |
| 143.50      | 20.30       | 0.08               | 70.00     | 37.40     |
| 190.20      | 21.30       | 0.14               | 73.80     | 24.10     |
