# Supplementary material for: Effects of Omega-3-Rich Pork Lard on Serum Lipid Profile and Gut Microbiome in C57BL/6NJ Mice
Source: Hindawi journal article supplement (doi:10.1155/2022/9269968), 2022-11-22
Supplement: f1 [file 9269968.f1.zip]

Supplementary table S2: Body weight change (%)

| Treatment   | Mouse # | Day 0  | Day 1  | Day 2  | Day 3  |
|-------------|---------|--------|--------|--------|--------|
| Control     | 1.00    | 100.00 | 99.65  | 97.22  | 100.35 |
|             | 2.00    | 100.00 | 99.29  | 98.94  | 100.35 |
|             | 3.00    | 100.00 | 101.75 | 103.50 | 106.29 |
|             | 4.00    | 100.00 | 100.34 | 98.29  | 99.32  |
|             | 5.00    | 100.00 | 102.42 | 102.77 | 101.04 |
|             | 6.00    | 100.00 | 99.66  | 99.66  | 99.32  |
|             | 7.00    | 100.00 | 99.30  | 100.70 | 101.74 |
|             | 8.00    | 100.00 | 98.67  | 98.00  | 100.33 |
| Coconut oil | 1.00    | 100.00 | 96.62  | 96.24  | 94.36  |
|             | 2.00    | 100.00 | 100.72 | 96.39  | 97.11  |
|             | 3.00    | 100.00 | 93.42  | 93.09  | 93.09  |
|             | 4.00    | 100.00 | 99.65  | 100.35 | 101.77 |
|             | 5.00    | 100.00 | 100.34 | 100.67 | 101.01 |
|             | 6.00    | 100.00 | 94.31  | 93.98  | 96.32  |
|             | 7.00    | 100.00 | 99.65  | 98.60  | 101.40 |
|             | 8.00    | 100.00 | 98.58  | 98.22  | 103.20 |
| Omega lard  | 1.00    | 100.00 | 104.93 | 106.25 | 103.95 |
|             | 2.00    | 100.00 | 102.81 | 103.16 | 102.81 |
|             | 3.00    | 100.00 | 101.33 | 102.00 | 104.00 |
|             | 4.00    | 100.00 | 98.38  | 96.44  | 99.68  |
|             | 5.00    | 100.00 | 99.67  | 101.64 | 103.95 |
|             | 6.00    | 100.00 | 101.63 | 104.90 | 105.23 |
|             | 7.00    | 100.00 | 97.08  | 97.73  | 99.35  |
|             | 8.00    | 100.00 |        |        |        |

Unit = %

| Day 4  | Day 5  | Day 6  | Day 7  | Day 8  | Day 9  |
|--------|--------|--------|--------|--------|--------|
| 100.69 | 100.00 | 98.61  | 98.61  | 98.61  | 98.61  |
| 101.42 | 101.42 | 101.77 | 102.48 | 103.90 | 101.77 |
| 107.69 | 108.04 | 105.24 | 104.55 | 104.90 | 103.15 |
| 100.68 | 101.02 | 100.00 | 99.66  | 102.05 | 101.71 |
| 101.38 | 100.69 | 100.35 | 100.00 | 102.42 | 100.69 |
| 98.64  | 98.98  | 99.66  | 98.64  | 101.36 | 101.02 |
| 101.39 | 100.35 | 100.00 | 101.74 | 101.74 | 101.74 |
| 100.33 | 100.33 | 99.67  | 100.00 | 100.67 | 99.67  |
| 93.98  | 97.74  | 98.50  | 101.13 | 101.50 | 105.26 |
| 94.95  | 100.36 | 96.39  | 97.83  | 97.11  | 100.00 |
| 94.41  | 97.70  | 96.38  | 100.00 | 103.95 | 102.30 |
| 102.12 | 103.18 | 102.47 | 103.53 | 103.18 | 103.18 |
| 101.01 | 100.67 | 100.00 | 104.04 | 103.37 | 103.70 |
| 97.32  | 96.66  | 95.99  | 97.99  | 97.66  | 99.00  |
| 103.51 | 101.05 | 100.70 | 101.05 | 101.75 | 104.21 |
| 102.49 | 105.34 | 102.49 | 103.20 | 106.05 | 107.12 |
| 104.93 | 105.59 | 106.91 | 107.89 | 108.55 | 110.20 |
| 105.26 | 106.32 | 105.26 | 108.07 | 109.82 | 113.33 |
| 104.67 | 107.00 | 107.33 | 106.00 | 109.33 | 112.00 |
| 99.35  | 101.29 | 102.59 | 102.59 | 103.88 | 104.85 |
| 108.22 | 108.88 | 107.24 | 107.89 | 108.55 | 111.51 |
| 107.19 | 108.82 | 110.13 | 111.44 | 111.44 | 114.71 |
| 98.05  | 99.35  | 100.65 | 101.62 | 103.57 | 106.17 |

| Day 10 | Day 11 | Day 12 | Day 13 | Day 14 | Day 15 |
|--------|--------|--------|--------|--------|--------|
| 99.31  | 100.00 | 99.65  | 98.61  | 97.92  | 97.22  |
| 102.13 | 101.42 | 102.48 | 101.77 | 102.48 | 101.42 |
| 103.85 | 103.85 | 104.55 | 102.45 | 103.15 | 101.75 |
| 101.02 | 103.07 | 103.07 | 102.05 | 101.02 | 102.73 |
| 101.38 | 99.31  | 100.69 | 100.00 | 99.65  | 101.38 |
| 101.36 | 101.36 | 103.05 | 101.36 | 102.03 | 102.03 |
| 101.74 | 102.44 | 102.44 | 101.74 | 102.79 | 103.83 |
| 101.00 | 100.33 | 100.67 | 99.00  | 99.67  | 101.67 |
| 106.77 | 108.65 | 109.40 | 112.03 | 113.16 | 113.16 |
| 100.72 | 100.36 | 103.61 | 101.44 | 101.81 | 102.53 |
| 106.25 | 104.61 | 105.59 | 107.24 | 108.22 | 111.18 |
| 107.42 | 108.13 | 109.19 | 108.83 | 109.89 | 113.07 |
| 103.70 | 106.06 | 106.40 | 107.41 | 107.74 | 106.06 |
| 101.34 | 101.00 | 104.01 | 103.68 | 106.02 | 105.02 |
| 103.86 | 104.91 | 104.91 | 108.07 | 107.37 | 110.88 |
| 108.19 | 107.83 | 108.90 | 110.68 | 110.32 | 109.25 |
| 111.84 | 114.47 | 116.78 | 117.43 | 116.78 | 120.39 |
| 112.98 | 117.54 | 118.60 | 120.00 | 118.25 | 121.05 |
| 112.33 | 114.33 | 115.00 | 117.33 | 119.67 | 119.33 |
| 110.68 | 112.30 | 114.24 | 113.92 | 114.56 | 116.18 |
| 115.13 | 114.47 | 114.14 | 113.49 | 114.80 | 117.11 |
| 117.32 | 118.30 | 119.93 | 117.65 | 121.24 | 122.55 |
| 107.79 | 110.06 | 110.06 | 111.04 | 113.64 | 113.31 |

| Day 16 | Day 17 | Day 18 | Day 19 | Day 20 | Day 21 |
|--------|--------|--------|--------|--------|--------|
| 98.96  | 96.88  | 99.31  | 101.04 | 100.69 | 99.65  |
| 103.90 | 102.13 | 103.19 | 104.96 | 105.32 | 104.26 |
| 102.80 | 103.50 | 103.15 | 101.75 | 102.45 | 101.75 |
| 104.78 | 104.10 | 103.41 | 103.75 | 105.46 | 104.44 |
| 102.77 | 101.04 | 101.04 | 101.73 | 104.50 | 102.08 |
| 102.71 | 102.71 | 102.37 | 103.39 | 106.10 | 105.76 |
| 103.83 | 104.18 | 103.83 | 104.53 | 103.14 | 103.48 |
| 102.00 | 101.33 | 101.67 | 101.33 | 102.67 | 103.00 |
| 116.54 | 117.29 | 117.29 | 120.68 | 121.80 | 123.31 |
| 105.05 | 105.05 | 105.42 | 105.78 | 106.50 | 107.58 |
| 112.50 | 113.82 | 112.83 | 114.80 | 115.46 | 114.14 |
| 113.07 | 115.90 | 113.43 | 117.31 | 117.31 | 117.31 |
| 106.73 | 106.06 | 108.08 | 109.43 | 109.76 | 113.47 |
| 107.36 | 109.03 | 110.03 | 110.37 | 112.04 | 112.37 |
| 110.88 | 110.18 | 112.28 | 113.33 | 112.98 | 115.44 |
| 109.61 | 111.74 | 111.74 | 114.59 | 113.88 | 113.52 |
| 120.07 | 121.38 | 122.04 | 123.03 | 127.30 | 128.29 |
| 121.75 | 123.16 | 124.56 | 127.02 | 126.67 | 127.72 |
| 121.33 | 124.33 | 125.67 | 125.67 | 126.67 | 129.33 |
| 119.09 | 119.74 | 122.98 | 124.60 | 125.57 | 126.86 |
| 118.75 | 119.74 | 122.70 | 123.03 | 125.66 | 126.32 |
| 125.16 | 124.18 | 128.43 | 128.43 | 130.39 | 130.72 |
| 116.88 | 117.21 | 119.16 | 122.08 | 123.38 | 124.35 |

| Day 22 | Day 23 | Day 24 | Day 25 | Day 26 | Day 27 |
|--------|--------|--------|--------|--------|--------|
| 100.00 | 101.74 | 101.04 | 102.78 | 102.43 | 101.04 |
| 106.03 | 105.67 | 107.09 | 108.16 | 107.09 | 107.09 |
| 103.85 | 103.50 | 103.50 | 105.59 | 104.20 | 102.80 |
| 107.17 | 106.83 | 107.17 | 108.53 | 107.17 | 107.85 |
| 105.19 | 104.50 | 103.81 | 106.23 | 103.81 | 104.50 |
| 107.46 | 107.46 | 106.78 | 109.15 | 108.47 | 108.47 |
| 106.62 | 106.62 | 105.92 | 107.32 | 106.97 | 105.57 |
| 103.67 | 102.33 | 102.67 | 103.00 | 101.67 | 101.67 |
| 125.94 | 123.68 | 122.56 | 124.81 | 124.81 | 127.07 |
| 107.22 | 110.47 | 111.91 | 112.27 | 115.88 | 115.16 |
| 119.41 | 118.75 | 118.75 | 121.38 | 121.05 | 122.04 |
| 120.14 | 119.43 | 121.20 | 123.67 | 123.67 | 124.73 |
| 114.48 | 115.49 | 117.85 | 120.54 | 120.54 | 119.87 |
| 113.38 | 114.38 | 114.72 | 118.73 | 117.73 | 117.73 |
| 114.74 | 116.84 | 117.89 | 118.95 | 119.65 | 119.30 |
| 118.15 | 118.15 | 118.51 | 121.00 | 119.93 | 119.93 |
| 130.59 | 130.59 | 133.22 | 135.53 | 135.53 | 135.53 |
| 130.18 | 129.82 | 134.04 | 134.74 | 132.63 | 134.04 |
| 129.67 | 130.00 | 132.33 | 133.67 | 133.67 | 133.00 |
| 128.80 | 127.83 | 128.48 | 130.74 | 131.39 | 132.69 |
| 127.30 | 127.63 | 128.95 | 129.61 | 131.25 | 131.58 |
| 133.33 | 133.66 | 135.62 | 136.93 | 137.25 | 138.89 |
| 125.32 | 126.62 | 127.92 | 128.90 | 130.84 | 131.49 |

Day 28

102.43

110.28

104.55

109.22

105.88

108.81

105.57

102.33

130.08

117.33

120.07

125.44

118.86

120.74

122.11

123.84

139.80

138.25

138.00

135.60

133.88

142.16

133.12
