# Supplementary material for: Effects of Omega-3-Rich Pork Lard on Serum Lipid Profile and Gut Microbiome in C57BL/6NJ Mice
Source: Hindawi journal article supplement (doi:10.1155/2022/9269968), 2022-11-22
Supplement: f1 [file 9269968.f1.zip]

Supplementary table S7: Hepatic macrovesicular steatosis score

| Scores      | Control | Coconut oil | Omega lard |
|-------------|---------|-------------|------------|
| Normal      | 8.00    | 4.00        | 3.00       |
| Minimal     | 0.00    | 3.00        | 5.00       |
| Mild        | 0.00    | 0.00        | 0.00       |
| Moderate    | 0.00    | 0.00        | 0.00       |
| Most severe | 0.00    | 0.00        | 0.00       |

Unit = animals (head)
