# Supplementary material for: Effects of Omega-3-Rich Pork Lard on Serum Lipid Profile and Gut Microbiome in C57BL/6NJ Mice
Source: Hindawi journal article supplement (doi:10.1155/2022/9269968), 2022-11-22
Supplement: f1 [file 9269968.f1.zip]

Supplementary table S1: Body weight

| Treatment   | Mouse # | Day 0 | Day 1 | Day 2 | Day 3 |
|-------------|---------|-------|-------|-------|-------|
| Control     | 1.00    | 28.80 | 28.70 | 28.00 | 28.90 |
|             | 2.00    | 28.20 | 28.00 | 27.90 | 28.30 |
|             | 3.00    | 28.60 | 29.10 | 29.60 | 30.40 |
|             | 4.00    | 29.30 | 29.40 | 28.80 | 29.10 |
|             | 5.00    | 28.90 | 29.60 | 29.70 | 29.20 |
|             | 6.00    | 29.50 | 29.40 | 29.40 | 29.30 |
|             | 7.00    | 28.70 | 28.50 | 28.90 | 29.20 |
|             | 8.00    | 30.00 | 29.60 | 29.40 | 30.10 |
| Coconut oil | 1.00    | 26.60 | 25.70 | 25.60 | 25.10 |
|             | 2.00    | 27.70 | 27.90 | 26.70 | 26.90 |
|             | 3.00    | 30.40 | 28.40 | 28.30 | 28.30 |
|             | 4.00    | 28.30 | 28.20 | 28.40 | 28.80 |
|             | 5.00    | 29.70 | 29.80 | 29.90 | 30.00 |
|             | 6.00    | 29.90 | 28.20 | 28.10 | 28.80 |
|             | 7.00    | 28.50 | 28.40 | 28.10 | 28.90 |
| Omega lard  | 1.00    | 28.10 | 27.70 | 27.60 | 29.00 |
|             | 2.00    | 30.40 | 31.90 | 32.30 | 31.60 |
|             | 3.00    | 28.50 | 29.30 | 29.40 | 29.30 |
|             | 4.00    | 30.00 | 30.40 | 30.60 | 31.20 |
|             | 5.00    | 30.90 | 30.40 | 29.80 | 30.80 |
|             | 6.00    | 30.40 | 30.30 | 30.90 | 31.60 |
|             | 7.00    | 30.60 | 31.10 | 32.10 | 32.20 |
|             | 8.00    | 30.80 | 29.90 | 30.10 | 30.60 |

Unit = gram

| Day 4 | Day 5 | Day 6 | Day 7 | Day 8 | Day 9 |
|-------|-------|-------|-------|-------|-------|
| 29.00 | 28.80 | 28.40 | 28.40 | 28.40 | 28.40 |
| 28.60 | 28.60 | 28.70 | 28.90 | 29.30 | 28.70 |
| 30.80 | 30.90 | 30.10 | 29.90 | 30.00 | 29.50 |
| 29.50 | 29.60 | 29.30 | 29.20 | 29.90 | 29.80 |
| 29.30 | 29.10 | 29.00 | 28.90 | 29.60 | 29.10 |
| 29.10 | 29.20 | 29.40 | 29.10 | 29.90 | 29.80 |
| 29.10 | 28.80 | 28.70 | 29.20 | 29.20 | 29.20 |
| 30.10 | 30.10 | 29.90 | 30.00 | 30.20 | 29.90 |
| 25.00 | 26.00 | 26.20 | 26.90 | 27.00 | 28.00 |
| 26.30 | 27.80 | 26.70 | 27.10 | 26.90 | 27.70 |
| 28.70 | 29.70 | 29.30 | 30.40 | 31.60 | 31.10 |
| 28.90 | 29.20 | 29.00 | 29.30 | 29.20 | 29.20 |
| 30.00 | 29.90 | 29.70 | 30.90 | 30.70 | 30.80 |
| 29.10 | 28.90 | 28.70 | 29.30 | 29.20 | 29.60 |
| 29.50 | 28.80 | 28.70 | 28.80 | 29.00 | 29.70 |
| 28.80 | 29.60 | 28.80 | 29.00 | 29.80 | 30.10 |
| 31.90 | 32.10 | 32.50 | 32.80 | 33.00 | 33.50 |
| 30.00 | 30.30 | 30.00 | 30.80 | 31.30 | 32.30 |
| 31.40 | 32.10 | 32.20 | 31.80 | 32.80 | 33.60 |
| 30.70 | 31.30 | 31.70 | 31.70 | 32.10 | 32.40 |
| 32.90 | 33.10 | 32.60 | 32.80 | 33.00 | 33.90 |
| 32.80 | 33.30 | 33.70 | 34.10 | 34.10 | 35.10 |
| 30.20 | 30.60 | 31.00 | 31.30 | 31.90 | 32.70 |

| Day 10 | Day 11 | Day 12 | Day 13 | Day 14 | Day 15 |
|--------|--------|--------|--------|--------|--------|
| 28.60  | 28.80  | 28.70  | 28.40  | 28.20  | 28.00  |
| 28.80  | 28.60  | 28.90  | 28.70  | 28.90  | 28.60  |
| 29.70  | 29.70  | 29.90  | 29.30  | 29.50  | 29.10  |
| 29.60  | 30.20  | 30.20  | 29.90  | 29.60  | 30.10  |
| 29.30  | 28.70  | 29.10  | 28.90  | 28.80  | 29.30  |
| 29.90  | 29.90  | 30.40  | 29.90  | 30.10  | 30.10  |
| 29.20  | 29.40  | 29.40  | 29.20  | 29.50  | 29.80  |
| 30.30  | 30.10  | 30.20  | 29.70  | 29.90  | 30.50  |
| 28.40  | 28.90  | 29.10  | 29.80  | 30.10  | 30.10  |
| 27.90  | 27.80  | 28.70  | 28.10  | 28.20  | 28.40  |
| 32.30  | 31.80  | 32.10  | 32.60  | 32.90  | 33.80  |
| 30.40  | 30.60  | 30.90  | 30.80  | 31.10  | 32.00  |
| 30.80  | 31.50  | 31.60  | 31.90  | 32.00  | 31.50  |
| 30.30  | 30.20  | 31.10  | 31.00  | 31.70  | 31.40  |
| 29.60  | 29.90  | 29.90  | 30.80  | 30.60  | 31.60  |
| 30.40  | 30.30  | 30.60  | 31.10  | 31.00  | 30.70  |
| 34.00  | 34.80  | 35.50  | 35.70  | 35.50  | 36.60  |
| 32.20  | 33.50  | 33.80  | 34.20  | 33.70  | 34.50  |
| 33.70  | 34.30  | 34.50  | 35.20  | 35.90  | 35.80  |
| 34.20  | 34.70  | 35.30  | 35.20  | 35.40  | 35.90  |
| 35.00  | 34.80  | 34.70  | 34.50  | 34.90  | 35.60  |
| 35.90  | 36.20  | 36.70  | 36.00  | 37.10  | 37.50  |
| 33.20  | 33.90  | 33.90  | 34.20  | 35.00  | 34.90  |

| Day 16 | Day 17 | Day 18 | Day 19 | Day 20 | Day 21 |
|--------|--------|--------|--------|--------|--------|
| 28.50  | 27.90  | 28.60  | 29.10  | 29.00  | 28.70  |
| 29.30  | 28.80  | 29.10  | 29.60  | 29.70  | 29.40  |
| 29.40  | 29.60  | 29.50  | 29.10  | 29.30  | 29.10  |
| 30.70  | 30.50  | 30.30  | 30.40  | 30.90  | 30.60  |
| 29.70  | 29.20  | 29.20  | 29.40  | 30.20  | 29.50  |
| 30.30  | 30.30  | 30.20  | 30.50  | 31.30  | 31.20  |
| 29.80  | 29.90  | 29.80  | 30.00  | 29.60  | 29.70  |
| 30.60  | 30.40  | 30.50  | 30.40  | 30.80  | 30.90  |
| 31.00  | 31.20  | 31.20  | 32.10  | 32.40  | 32.80  |
| 29.10  | 29.10  | 29.20  | 29.30  | 29.50  | 29.80  |
| 34.20  | 34.60  | 34.30  | 34.90  | 35.10  | 34.70  |
| 32.00  | 32.80  | 32.10  | 33.20  | 33.20  | 33.20  |
| 31.70  | 31.50  | 32.10  | 32.50  | 32.60  | 33.70  |
| 32.10  | 32.60  | 32.90  | 33.00  | 33.50  | 33.60  |
| 31.60  | 31.40  | 32.00  | 32.30  | 32.20  | 32.90  |
| 30.80  | 31.40  | 31.40  | 32.20  | 32.00  | 31.90  |
| 36.50  | 36.90  | 37.10  | 37.40  | 38.70  | 39.00  |
| 34.70  | 35.10  | 35.50  | 36.20  | 36.10  | 36.40  |
| 36.40  | 37.30  | 37.70  | 37.70  | 38.00  | 38.80  |
| 36.80  | 37.00  | 38.00  | 38.50  | 38.80  | 39.20  |
| 36.10  | 36.40  | 37.30  | 37.40  | 38.20  | 38.40  |
| 38.30  | 38.00  | 39.30  | 39.30  | 39.90  | 40.00  |
| 36.00  | 36.10  | 36.70  | 37.60  | 38.00  | 38.30  |

| Day 22 | Day 23 | Day 24 | Day 25 | Day 26 | Day 27 |
|--------|--------|--------|--------|--------|--------|
| 28.80  | 29.30  | 29.10  | 29.60  | 29.50  | 29.10  |
| 29.90  | 29.80  | 30.20  | 30.50  | 30.20  | 30.20  |
| 29.70  | 29.60  | 29.60  | 30.20  | 29.80  | 29.40  |
| 31.40  | 31.30  | 31.40  | 31.80  | 31.40  | 31.60  |
| 30.40  | 30.20  | 30.00  | 30.70  | 30.00  | 30.20  |
| 31.70  | 31.70  | 31.50  | 32.20  | 32.00  | 32.00  |
| 30.60  | 30.60  | 30.40  | 30.80  | 30.70  | 30.30  |
| 31.10  | 30.70  | 30.80  | 30.90  | 30.50  | 30.50  |
| 33.50  | 32.90  | 32.60  | 33.20  | 33.20  | 33.80  |
| 29.70  | 30.60  | 31.00  | 31.10  | 32.10  | 31.90  |
| 36.30  | 36.10  | 36.10  | 36.90  | 36.80  | 37.10  |
| 34.00  | 33.80  | 34.30  | 35.00  | 35.00  | 35.30  |
| 34.00  | 34.30  | 35.00  | 35.80  | 35.80  | 35.60  |
| 33.90  | 34.20  | 34.30  | 35.50  | 35.20  | 35.20  |
| 32.70  | 33.30  | 33.60  | 33.90  | 34.10  | 34.00  |
| 33.20  | 33.20  | 33.30  | 34.00  | 33.70  | 33.70  |
| 39.70  | 39.70  | 40.50  | 41.20  | 41.20  | 41.20  |
| 37.10  | 37.00  | 38.20  | 38.40  | 37.80  | 38.20  |
| 38.90  | 39.00  | 39.70  | 40.10  | 40.10  | 39.90  |
| 39.80  | 39.50  | 39.70  | 40.40  | 40.60  | 41.00  |
| 38.70  | 38.80  | 39.20  | 39.40  | 39.90  | 40.00  |
| 40.80  | 40.90  | 41.50  | 41.90  | 42.00  | 42.50  |
| 38.60  | 39.00  | 39.40  | 39.70  | 40.30  | 40.50  |

Day 28

29.50

31.10

29.90

32.00

30.60

32.10

30.30

30.70

34.60

32.50

36.50

35.50

35.30

36.10

34.80

34.80

42.50

39.40

41.40

41.90

40.70

43.50

41.00
