# Supplementary material for: Effects of Omega-3-Rich Pork Lard on Serum Lipid Profile and Gut Microbiome in C57BL/6NJ Mice
Source: Hindawi journal article supplement (doi:10.1155/2022/9269968), 2022-11-22
Supplement: f1 [file 9269968.f1.zip]

Supplementary table S3: Accumulated diet intake

| Treatment   | Mouse # | Day 1 | Day 2 | Day 3 | Day 4 |
|-------------|---------|-------|-------|-------|-------|
| Control     | 1.00    | 4.90  | 8.50  | 12.90 | 18.50 |
|             | 2.00    | 4.30  | 8.70  | 13.10 | 17.80 |
|             | 3.00    | 4.50  | 10.50 | 16.50 | 22.20 |
|             | 4.00    | 4.90  | 8.90  | 13.50 | 18.30 |
|             | 5.00    | 4.70  | 9.70  | 13.60 | 18.10 |
|             | 6.00    | 4.50  | 8.90  | 13.10 | 16.80 |
|             | 7.00    | 5.20  | 9.80  | 14.40 | 19.20 |
|             | 8.00    | 4.00  | 8.50  | 6.10  | 10.40 |
| Coconut oil | 1.00    | 11.60 | 22.80 | 34.40 | 44.30 |
|             | 2.00    | 13.40 | 24.10 | 37.70 | 49.40 |
|             | 3.00    | 9.30  | 20.00 | 31.40 | 43.20 |
|             | 4.00    | 13.10 | 25.90 | 36.50 | 48.00 |
|             | 5.00    | 15.40 | 27.50 | 40.70 | 54.00 |
|             | 6.00    | 11.80 | 24.00 | 37.00 | 49.00 |
|             | 7.00    | 14.70 | 27.70 | 40.50 | 54.00 |
| Omega lard  | 1.00    | 13.80 | 26.20 | 38.80 | 50.20 |
|             | 2.00    | 9.00  | 23.30 | 35.40 | 45.90 |
|             | 3.00    | 14.30 | 27.50 | 39.50 | 51.10 |
|             | 4.00    | 16.40 | 31.80 | 36.60 | 50.80 |
|             | 5.00    | 14.10 | 26.70 | 38.20 | 50.70 |
|             | 6.00    | 13.90 | 28.30 | 42.70 | 57.20 |
|             | 7.00    | 14.80 | 31.30 | 46.10 | 59.50 |
|             | 8.00    | 10.30 | 14.70 | 27.70 | 38.70 |

Unit = Gram

| Day 5 | Day 6 | Day 7 | Day 8  | Day 9  | Day 10 |
|-------|-------|-------|--------|--------|--------|
| 22.80 | 26.00 | 29.50 | 33.70  | 37.80  | 41.80  |
| 22.50 | 26.80 | 30.70 | 36.00  | 39.70  | 43.80  |
| 27.30 | 30.40 | 33.50 | 37.60  | 41.40  | 45.10  |
| 22.40 | 26.30 | 29.90 | 34.00  | 38.00  | 42.00  |
| 22.10 | 25.80 | 29.30 | 34.00  | 37.70  | 41.70  |
| 20.90 | 25.20 | 29.10 | 33.80  | 37.90  | 42.10  |
| 23.60 | 27.70 | 32.00 | 36.40  | 40.80  | 45.10  |
| 15.10 | 18.90 | 23.80 | 28.20  | 32.20  | 36.50  |
| 56.60 | 68.00 | 79.60 | 91.60  | 104.70 | 115.20 |
| 61.70 | 71.70 | 81.90 | 92.80  | 103.60 | 113.60 |
| 55.00 | 65.60 | 77.30 | 91.10  | 100.50 | 112.80 |
| 60.10 | 70.10 | 81.10 | 91.20  | 101.70 | 114.00 |
| 65.30 | 76.30 | 89.30 | 100.90 | 112.20 | 123.80 |
| 60.30 | 71.40 | 82.90 | 93.90  | 104.50 | 115.40 |
| 64.80 | 74.70 | 86.20 | 97.20  | 107.70 | 117.80 |
| 61.80 | 71.20 | 81.40 | 93.00  | 103.00 | 113.40 |
| 56.30 | 68.90 | 79.90 | 91.20  | 103.50 | 116.90 |
| 63.40 | 75.50 | 87.40 | 100.00 | 112.80 | 124.30 |
| 63.70 | 76.30 | 87.80 | 100.60 | 112.80 | 124.40 |
| 63.90 | 77.10 | 89.50 | 101.90 | 114.20 | 127.90 |
| 70.50 | 82.50 | 93.70 | 106.10 | 119.40 | 132.80 |
| 72.40 | 81.90 | 93.50 | 105.00 | 117.90 | 130.70 |
| 50.80 | 63.20 | 74.30 | 86.60  | 99.70  | 112.40 |

| Day 11 | Day 12 | Day 13 | Day 14 | Day 15 | Day 16 |
|--------|--------|--------|--------|--------|--------|
| 46.10  | 50.10  | 53.40  | 57.00  | 60.70  | 64.70  |
| 47.70  | 51.90  | 55.30  | 59.60  | 63.70  | 68.10  |
| 49.10  | 53.50  | 57.70  | 61.80  | 65.80  | 70.80  |
| 46.50  | 50.50  | 54.40  | 57.60  | 62.30  | 66.90  |
| 45.30  | 49.10  | 53.10  | 57.10  | 61.90  | 66.80  |
| 46.40  | 50.50  | 54.60  | 58.80  | 63.10  | 67.50  |
| 49.20  | 53.30  | 57.40  | 61.10  | 65.60  | 70.00  |
| 40.60  | 44.50  | 48.40  | 52.50  | 57.40  | 61.70  |
| 126.30 | 137.90 | 149.80 | 161.50 | 173.50 | 185.60 |
| 123.40 | 133.80 | 145.30 | 155.90 | 167.50 | 179.90 |
| 123.30 | 134.10 | 145.70 | 156.90 | 170.40 | 183.70 |
| 124.70 | 135.00 | 145.90 | 157.10 | 171.20 | 183.00 |
| 135.00 | 146.60 | 159.50 | 171.40 | 182.90 | 195.20 |
| 126.30 | 138.30 | 149.80 | 161.20 | 173.90 | 187.50 |
| 128.50 | 141.10 | 150.80 | 164.50 | 178.30 | 191.30 |
| 123.30 | 136.40 | 146.50 | 156.20 | 166.60 | 177.40 |
| 128.30 | 137.10 | 149.90 | 163.10 | 177.40 | 189.40 |
| 136.90 | 148.30 | 160.50 | 171.10 | 182.90 | 195.40 |
| 136.70 | 148.20 | 160.60 | 173.10 | 185.70 | 198.20 |
| 137.40 | 150.10 | 162.10 | 174.50 | 187.00 | 200.30 |
| 145.40 | 157.50 | 170.00 | 183.10 | 195.20 | 208.80 |
| 142.60 | 155.60 | 167.80 | 181.30 | 194.10 | 206.90 |
| 125.40 | 137.90 | 150.20 | 162.50 | 175.50 | 189.10 |

| Day 17 | Day 18 | Day 19 | Day 20 | Day 21 | Day 22 |
|--------|--------|--------|--------|--------|--------|
| 68.60  | 72.80  | 77.20  | 81.60  | 85.30  | 89.50  |
| 72.10  | 76.40  | 81.10  | 85.20  | 88.90  | 93.30  |
| 75.60  | 79.80  | 83.10  | 87.10  | 90.60  | 94.60  |
| 71.00  | 75.00  | 78.90  | 82.90  | 86.60  | 91.30  |
| 70.70  | 74.90  | 79.10  | 83.10  | 87.10  | 91.50  |
| 71.70  | 76.00  | 80.30  | 85.10  | 89.30  | 94.00  |
| 74.40  | 78.20  | 82.60  | 86.30  | 90.70  | 95.40  |
| 65.80  | 70.10  | 74.10  | 77.90  | 82.70  | 87.20  |
| 198.80 | 209.40 | 221.60 | 233.70 | 244.90 | 256.80 |
| 191.20 | 200.80 | 210.50 | 221.40 | 231.00 | 242.20 |
| 196.00 | 205.70 | 215.70 | 226.50 | 235.10 | 246.50 |
| 195.10 | 203.60 | 217.20 | 227.20 | 236.60 | 248.30 |
| 205.70 | 216.20 | 228.70 | 241.20 | 252.20 | 265.20 |
| 200.10 | 207.90 | 220.00 | 232.10 | 242.70 | 254.80 |
| 202.50 | 213.50 | 225.20 | 236.10 | 247.50 | 259.20 |
| 188.50 | 199.50 | 211.40 | 222.10 | 232.90 | 244.00 |
| 200.70 | 212.90 | 226.60 | 239.00 | 251.70 | 263.20 |
| 206.20 | 218.80 | 231.30 | 243.70 | 255.00 | 265.70 |
| 209.80 | 221.60 | 233.20 | 244.30 | 256.50 | 266.50 |
| 211.00 | 224.10 | 236.90 | 249.40 | 261.70 | 273.90 |
| 224.40 | 236.90 | 249.60 | 261.80 | 274.00 | 285.90 |
| 218.40 | 231.20 | 242.70 | 255.30 | 266.70 | 278.00 |
| 201.40 | 213.90 | 228.00 | 240.90 | 254.00 | 266.30 |

| Day 23 | Day 24 | Day 25 | Day 26 | Day 27 | Day 28 |
|--------|--------|--------|--------|--------|--------|
| 94.20  | 98.40  | 102.70 | 106.80 | 110.60 | 114.50 |
| 97.30  | 101.40 | 106.00 | 110.30 | 114.20 | 118.60 |
| 98.80  | 102.40 | 107.40 | 111.80 | 115.10 | 119.00 |
| 95.80  | 99.40  | 101.30 | 105.10 | 109.30 | 113.50 |
| 95.90  | 99.70  | 104.40 | 107.90 | 111.90 | 115.50 |
| 98.50  | 102.80 | 107.90 | 112.50 | 117.20 | 121.40 |
| 99.80  | 104.20 | 108.60 | 113.10 | 116.50 | 120.40 |
| 91.20  | 94.90  | 99.10  | 103.00 | 106.50 | 110.20 |
| 266.40 | 276.30 | 286.70 | 297.60 | 309.10 | 321.70 |
| 253.00 | 264.20 | 275.50 | 287.90 | 299.20 | 310.90 |
| 257.30 | 266.70 | 278.50 | 289.10 | 299.90 | 309.70 |
| 259.00 | 270.00 | 281.00 | 292.10 | 303.40 | 315.50 |
| 277.70 | 290.60 | 302.00 | 313.90 | 326.60 | 336.80 |
| 265.90 | 277.30 | 291.00 | 303.30 | 315.40 | 329.10 |
| 270.10 | 281.80 | 293.60 | 305.10 | 316.10 | 328.30 |
| 254.60 | 265.50 | 277.80 | 289.20 | 300.60 | 313.50 |
| 275.90 | 288.60 | 301.70 | 314.20 | 326.70 | 341.70 |
| 277.10 | 290.70 | 303.10 | 315.00 | 326.80 | 341.10 |
| 278.70 | 290.20 | 304.00 | 317.30 | 328.30 | 342.00 |
| 285.80 | 297.50 | 310.60 | 323.50 | 334.80 | 346.80 |
| 297.60 | 309.40 | 322.00 | 335.00 | 348.60 | 361.40 |
| 289.90 | 301.60 | 315.20 | 326.70 | 339.90 | 350.70 |
| 279.40 | 291.90 | 305.30 | 318.40 | 333.30 | 345.10 |
