# Supplementary material for: Effects of Omega-3-Rich Pork Lard on Serum Lipid Profile and Gut Microbiome in C57BL/6NJ Mice
Source: Hindawi journal article supplement (doi:10.1155/2022/9269968), 2022-11-22
Supplement: f1 [file 9269968.f1.zip]

Supplementary table S6: Organ weight

| Treatment   | Mouse # | Liver weight | Visceral fat |
|-------------|---------|--------------|--------------|
| Control     | 1.00    | 4.17         | 2.55         |
|             | 2.00    | 4.24         | 2.95         |
|             | 3.00    | 4.11         | 3.30         |
|             | 4.00    | 4.44         | 3.40         |
|             | 5.00    | 4.32         | 2.63         |
|             | 6.00    | 4.07         | 3.20         |
|             | 7.00    | 4.32         | 2.34         |
|             | 8.00    | 4.21         | 2.41         |
| Coconut oil | 1.00    | 4.35         | 6.51         |
|             | 2.00    | 4.63         | 4.88         |
|             | 3.00    | 4.17         | 7.87         |
|             | 4.00    | 4.13         | 5.72         |
|             | 5.00    | 4.42         | 5.18         |
|             | 6.00    | 4.41         | 5.70         |
|             | 7.00    | 4.17         | 5.26         |
| Omega lard  | 1.00    | 3.41         | 6.60         |
|             | 2.00    | 3.65         | 7.90         |
|             | 3.00    | 3.42         | 7.38         |
|             | 4.00    | 3.64         | 7.45         |
|             | 5.00    | 3.57         | 7.72         |
|             | 6.00    | 3.59         | 8.08         |
|             | 7.00    | 3.61         | 8.09         |
|             | 8.00    | 3.23         | 7.41         |

Unit = % relative to body weight
