# Supplementary material for: Effects of Omega-3-Rich Pork Lard on Serum Lipid Profile and Gut Microbiome in C57BL/6NJ Mice
Source: Int J Food Sci. 2022 Nov 22;2022:9269968. doi: 10.1155/2022/9269968 (PMC9708346; doi:10.1155/2022/9269968)
Supplement: Supplementary Materials — All supporting information has been provided as follows: Table S1: body weight; Table S2: body weight change (%); Table S3: accumulated diet intake; Table S4: accumulated calorie intake; Table S5: blood chemistry; Table S6: organ weight; Table S7: hepatic macrovesicular steatosis score; Table S8: abundance of bacterial taxa in the microbiome; Table S9: correlation between microbiome and serum lipid content; and Table S10: comparison between raw materials analyzed data and the USDA data. [file 9269968.f1.zip]

Archive with 10 entries (10 files):
- Table S1 - Body weight.pdf
- Table S10 - Comparison between raw material analyzed data and USDA data (1).pdf
- Table S2 - Body weight change (%).pdf
- Table S3 - Accumulated diet intake.pdf
- Table S4 - Accumulated calorie intake.pdf
- Table S5 - Blood chemistry.pdf
- Table S6 - Organ weight.pdf
- Table S7 - Hepatic macrovesicular steatosis score.pdf
- Table S8 - Microbiome abundance.pdf
- Table S9 - Microbiome and lipid profile correlation.pdf
